# Supplementary material for: Optilume Balloon Dilation for Radiation Induced Posterior Urethral Stenosis: A Multi-Institutional Experience
Source: Research Square preprint supplement (doi:10.21203/rs.3.rs-5649049/v1), 2025-04-10
Supplement: Supplementary file 1 [file 40c526cf925a74295f6f51ae.xlsx]

## Sheet: Sheet1
Patient	Age at surgery	BMI	Prior surgery for BPH	Perform CIC	Prior interventions for stricture	#prior dilation	XRT=1, Brachy=2, RALP+XRT=3	Post op foley duration (Days)	90 day Complication: None = 0, clot retention = 1, new incontinence=2, retention=3	Post op cysto (Y/N)	Patent urethra on post op cysto 0=no cysto, 1=open, 2=strictured	Symptomatic recurrence 0=no, 1=yes, 2=unk	Success 0=no, 1=yes, 2=unk	Duration of follow up (days)	Stricture length	Need for repeat intervention
1	76	27.1	1	0	1	2	1	1	0	0	0	0	1	210	3cm
2	87	28.1	0	0	1	3	1	4	0	1	1	0	1	60	1cm
3	63	27.6	0	0	1	18	1	2	1	0	0	0	1	60	NA
4	70	26.7	0	0	1	2	3	4	0	1	1	0	1	480	1.5cm
5	71	41.7	0	0	1	2	1	3	0	1	1	0	1	380	1cm
6	60	38.3	0	1	1	4	2	3	0	1	1	1	0	180	1cm	1				Subject Demographics
7	88	21.5	0	0	1	2	1	3	0	1	1	0	1	90	1cm					No. Pts	56
8	78	27.9	0	0	0	0	1	5	0	1	2	1	0	420	1cm	1				Age at surgery (Avg, SD)	73.37 (7.61)
9	77	24.78	0	0	1	0	1	5	0	1	1	0	1	450	1.5cm					Follow-up duration, days (Avg, SD)	179.4 (134.9)
10	76	24.14	0	0	1	1	2	2	0	1	1	0	1	240	1.5cm					BMI (Avg, SD)	29.59 (6.55)
11	68	24.13	0	0	1	0	3	5	1	1	1	1	1	240	2cm					Stricture Etiology (%)
12	67	29.53	1	0	0	0	1	3	0	1	1	0	1	335	1cm					Radiation	56 (100%)
13	77	29.66	0	1	1	1	2	3	0	1	1	0	1	75	NA					Prior Interventions
14	77	22.12	0	1	1	1	1	3	0	1	2	1	0	120	NA	1				Patients with prior intervention (#, %)	31 (55.4%)
15	67	32.1	1	0	0	0	1	3	0	1	1	0	1	350	1cm					Number of Endoscopic Dilations (Avg, SD)	1.25 (2.57)
16	61	46.25	0	0	1	3	2	3	0	1	1	0	1	180	NA					Number of Urethroplasty (#, SD)	5 (8.9%)
17	67	31.16	1	1	1	2	2	3	0	0	0	1	0	30	2.5cm	1				Stricture Length (cm), (Avg, SD)	1.83 (0.98)
18	76	30.57	0	0	0	0	1	3	0	1	1	0	1	45	0.4cm					Stricture Location (#, %)
19	69	30.25	0	1	1	3	1	1	0	0	0	0	1	14	1					Bulbomembranous	56 (100%)
20	63	27.75	0	0	1	2	1	1	0	0	0	0	1	13	1					Post-Op Cysto
21	80	26.57	0	0	1	0	1	1	0	0	0	0	1	105	NA					Cystoscopy performed	29 (51.8%)
22	81	25.12	0	0	0	0	1	1	0	0	0	0	1	159	3					Patent on cystoscopy	22 (75.9%)
23	77	22.23	1	0	0	0	1	1	0	1	2	1	0	223	3	1				Stricture recurrence on cystoscopy	7 (24.1%)
24	72	29.17	1	1	0	0	1	1	0	0	0	0	1	47	2					90 day Complications (#, %)	6 (10.7%)
25	79	27.91	0	0	0	0	1	1	0	0	0	0	1	143	NA					Acute urinary retention (#, %)	3 (5.4%)
26	79	25.29	1	1	0	0	1	1	0	0	0	0	1	30	NA					Clot retention (#, %)	2 (3.33%)
27	61	51.05	1	1	1	1	1	1	0	0	0	0	1	73	1					Incontinence (#, %)	1 (1.67%)
28	72	32.88	0	0	0	0	1	1	0	0	0	0	1	92	NA					Optilume Success after >=3 Month Follow-Up
29	75	28.23	0	0	0	0	1	1	2	0	0	0	1	106	NA					No. Pts	37
30	77	28.31	0	1	0	0	1	1	0	0	0	0	1	69	NA					Symptomatic stricture recurrence	9 (24.3%)
31	64	29.79	0	1	1	1	1	1	0	1	2	1	0	465	NA	1				Freedom from re-intervention	30 (81.1%)
32	75	27.1	0	0	1	0	1	3	0	1	1	0	1	369	0.75cm
33	69.6	26.7	0	0	1	0	1	3	0	0	0	0	1	42	0.75cm
34	67.4	24.14	0	0	0	0	3	4	0	1	2	1	1	324	0.75cm
35	87.1	25.1	0	0	0	1	3	6	0	0	0	0	1	54	0.75cm
36	84.4	36.2	0	0	1	1	1	6	0	0	0	0	2	60	1cm
37	69.6	25.38	0	0	0	0	1	2	0	0	0	0	1	93	NA
38	74.2	28.7	0	1	0	1	2	3	0	0	0	0	1	234	2.5cm
39	72.2	49.5	0	1	1	1	1	2	0	1	1	0	1	225	1.5cm
40	71.6	29.42	0	1	0	1	2	7	0	0	0	2	2	6	1.25cm
41	77.6	26.78	0	0	0	0	2	3	0	0	0	0	1	93	1.75cm
42	72.3	24.01	0	0	0	0	1	2	0	0	0	0	1	96	NA
43	75.8	30.29	1	0	0	1	3	3	3	1	1	0	1	195	0.75cm
44	79.6	41.5	0	1	1	1	1	12	3	1	2	0	1	234	NA
45	78.2	35.59	0	0	0	1	1	4	0	0	0	0	1	168	NA
46	73.3	36.13	0	0	0	1	1	4	0	1	1	0	1	75	NA
47	62	28.8	0	0	1	1	1	3	0	1	1	0	1	60	1 cm
48	80	31.24	0	0	1	1	1	3	0	0	0	0	1	60	3 cm
49	80	24.21	0	0	1	1	1	2	0	0	0	2	2	14	2.5cm
50	88	23.7	0	0	1	6	1	3	0	0	0	0	1	270	NA
51	68	17.51	0	0	0	0	1	3	0	0	0	0	1	270	NA
52	60	27.99	0	0	1	1	1	3	3	1	1	0	1	360	NA
53	73	35.24	0	0	1	1	1	2	0	1	1	0	1	360	2 cm
54	88	27.53	0	0	1	2	1	2	0	1	1	0	1	270	2.5 cm
55	66	29.24	0	0	0	0	3	3	0	1	2	1	0	360	1 cm	1
56	61	26.97	0	0	0	0	3	3	0	1	1	0	1	270	5 cm
